# Supplementary material
Source: PubMed Central journal article supplement (PMC4168316)
Supplement: supp_kxu016_kxu016supp.pdf [file supp_kxu016_kxu016supp.pdf]

# Estimating Effect of Environmental Contaminants on Women's Subfecundity for the MoBa Study Data with an Outcome-Dependent Sampling Scheme

JIELI DING

*School of Mathematics and Statistics, Wuhan University,  
Wuhan, Hubei 430072, China*

HAIBO ZHOU\*

*Department of Biostatistics, University of North Carolina at Chapel Hill,  
Chapel Hill, North Carolina 27599, USA  
zhou@bios.unc.edu*

YANYAN LIU

*School of Mathematics and Statistics, Wuhan University,  
Wuhan, Hubei 430072, China*

JIANWEN CAI

*Department of Biostatistics, University of North Carolina at Chapel Hill,  
Chapel Hill, North Carolina 27599, USA*

MATTHEW P. LONGNECKER

*National Institute of Environmental Health Sciences, National Institute of Health,  
Research Triangle Park, North Carolina 27709, USA*

## APPENDIX: PROOF OF ASYMPTOTIC PROPERTIES

We establish the consistency of the proposed EMSELE  $\hat{\xi}$  for  $\xi^0$  by applying the lemma developed by Weaver (2001) as an extension of the result of Foutz (1977), which states the existence of a unique consistent solution to a general estimating equation. We then derive the asymptotic normal properties of EMSELE by standard methods given the consistency.

We require the following conditions:

\*To whom correspondence should be addressed.

(C1) The parameter space,  $\mathcal{B}$ , is a compact subset of  $R^p$ .  $\beta^0$  lies in the interior of  $\mathcal{B}$ , and the covariate space,  $\mathcal{Z}$ , is compact;

(C2)  $\lambda_0(t)$  is strictly positive and differentiable for  $t \in [0, \tau]$ ;

(C3) Let  $S_0^{(d)}(\beta, t)$  and  $s_0^{(d)}(\beta, t)$  ( $d = 0, 1, 2$ ) be as in Section 2.3. There exists a neighborhood  $D$  of  $\beta^0$  such that  $\sup_{t \in [0, \tau], \beta \in D} \|S_0^{(d)}(\beta, t) - s_0^{(d)}(\beta, t)\| \xrightarrow{P} 0$ ,  $d = 0, 1, 2$ ;

(C4)  $s_0^{(d)}(\beta, t)$ ,  $d = 0, 1, 2$  are continuous functions of  $\beta \in D$  uniformly in  $t \in [0, \tau]$ .  $s_0^{(d)}(\beta, t)$ ,  $d = 0, 1, 2$  are bounded on  $D \times [0, \tau]$ , and  $s_0^{(0)}(\beta, t)$  is bounded away from zero on  $D \times [0, \tau]$ . Interchanges of differentiation and integration of  $s_0^{(0)}(\beta, t)$  are valid for the first and second partial derivatives with respect to  $\beta$ ;

(C5) The matrix  $A_0(\beta^0) = \int_0^\tau v_0(\beta^0, t) s_0^{(0)}(\beta^0, t) \lambda_0(t) dt$  is positive definite.

(C6) Interchanges of differentiation and integration of  $f_{\beta, \Lambda_0}(t|Z)$  are valid for the first and second partial derivatives with respect to  $\beta$ ;

(C7) The quantities  $\sum_{l=1}^K \frac{\rho_l/\rho_0}{\pi_l^0} \nabla_{\beta_j} P_l(Z; \beta^0)$ ,  $j = 1, \dots, p$  are linearly independent on  $\mathcal{Z}$ , i.e., if  $\alpha$  is any  $p$ -vector such that  $\sum_{j=1}^p \alpha_j \sum_{l=1}^K \frac{\rho_l/\rho_0}{\pi_l^0} \nabla_{\beta_j} P_l(Z; \beta^0) = 0$  for almost all  $Z \in \mathcal{Z}$ , then  $\alpha = 0$ .

**Proof of Theorem 2.1:** We first calculate the first and second derivatives of the profile likelihood function. We write the resulting profile likelihood function in (2.8) as:

$$\begin{aligned}
\hat{l}(\beta, \pi) &= \hat{l}_1(\beta) + \hat{l}_2(\beta) + \hat{l}_3(\beta, \pi), \\
\hat{l}_1(\beta) &= \Delta_i \left( \beta^t Z_i - \log \left( \sum_{l \in S_0} Y_l(T_i) e^{\beta^t Z_l} \right) \right), \\
\hat{l}_2(\beta) &= \sum_{k=1}^K \sum_{i \in S_k} \log f_{\beta, \hat{\Lambda}_0}(T_i | Z_i), \\
\hat{l}_3(\beta, \pi) &= - \sum_{k=0}^K \sum_{i \in S_k} \log \left( n_0 \left( 1 + \sum_{l=1}^K \frac{n_l}{n_0 \pi_l} P_l(Z_i; \beta) \right) \right) - \sum_{k=1}^K n_k \log \pi_k. \tag{A.1}
\end{aligned}$$

The first derivatives of the profile likelihood function are:

$$\begin{aligned}
 \frac{\partial \hat{l}_1(\beta)}{\partial \beta} &= \sum_{i \in S_0} \int_0^\tau \left( Z_i - \frac{S^{(1)}(\beta, t)}{S^{(0)}(\beta, t)} \right) dN_i(t), \\
 \frac{\partial \hat{l}_2(\beta)}{\partial \beta} &= \sum_{k=1}^K \sum_{i \in S_k} \frac{\nabla_\beta f_{\beta, \hat{\Lambda}_0}(T_i | Z_i)}{f_{\beta, \hat{\Lambda}_0}(T_i | Z_i)}, \\
 \frac{\partial \hat{l}_3(\beta, \pi)}{\partial \beta} &= - \sum_{k=0}^K \sum_{i \in S_k} \frac{\sum_{l=1}^K \frac{n_l}{n_0 \pi_l} \nabla_\beta P_l(Z_i; \beta)}{1 + \sum_{l=1}^K \frac{n_l}{n_0 \pi_l} P_l(Z_i; \beta)}, \\
 \frac{\partial \hat{l}_3(\beta, \pi)}{\partial \pi_m} &= \sum_{k=0}^K \sum_{i \in S_k} \frac{\frac{n_m}{n_0 \pi_m^2} P_m(Z_i; \beta)}{1 + \sum_{l=1}^K \frac{n_l}{n_0 \pi_l} P_l(Z_i; \beta)} - \frac{n_m}{\pi_m}, \quad m = 1, \dots, K. \tag{A.2}
 \end{aligned}$$

The second derivatives of the profile likelihood function are:

$$\begin{aligned}
 -\frac{\partial^2 \hat{l}_1(\beta)}{\partial \beta \partial \beta'} &= \sum_{i \in S_0} \int_0^\tau \left( \frac{S^{(2)}(\beta, t)}{S^{(0)}(\beta, t)} - \left( \frac{S^{(1)}(\beta, t)}{S^{(0)}(\beta, t)} \right)^{\otimes 2} \right) dN_i(t), \\
 -\frac{\partial^2 \hat{l}_2(\beta)}{\partial \beta \partial \beta'} &= - \sum_{k=1}^K \sum_{i \in S_k} \left( \frac{\nabla_\beta^2 f_{\beta, \hat{\Lambda}_0}(T_i | Z_i)}{f_{\beta, \hat{\Lambda}_0}(T_i | Z_i)} - \left( \frac{\nabla_\beta f_{\beta, \hat{\Lambda}_0}(T_i | Z_i)}{f_{\beta, \hat{\Lambda}_0}(T_i | Z_i)} \right)^{\otimes 2} \right), \\
 -\frac{\partial^2 \hat{l}_3(\beta, \pi)}{\partial \beta \partial \beta'} &= \sum_{k=0}^K \sum_{i \in S_k} \left( \frac{\sum_{l=1}^K \frac{n_l}{n_0 \pi_l} \nabla_\beta^2 P_l(Z_i; \beta)}{1 + \sum_{l=1}^K \frac{n_l}{n_0 \pi_l} P_l(Z_i; \beta)} - \frac{\left( \sum_{l=1}^K \frac{n_l}{n_0 \pi_l} \nabla_\beta P_l(Z_i; \beta) \right)^{\otimes 2}}{\left( 1 + \sum_{l=1}^K \frac{n_l}{n_0 \pi_l} P_l(Z_i; \beta) \right)^2} \right),
 \end{aligned}$$

and

$$\begin{aligned}
 -\frac{\partial^2 \hat{l}_3(\beta, \pi)}{\partial \beta \partial \pi'_m} &= \sum_{k=0}^K \sum_{i \in S_k} \frac{-\frac{n_m}{n_0 \pi_m^2} \nabla_\beta P_m(Z_i; \beta)}{1 + \sum_{l=1}^K \frac{n_l}{n_0 \pi_l} P_l(Z_i; \beta)} + \sum_{k=0}^K \sum_{i \in S_k} \frac{\frac{n_m}{n_0 \pi_m^2} P_m(Z_i; \beta) \left( \sum_{l=1}^K \frac{n_l}{n_0 \pi_l} \nabla_\beta P_l(Z_i; \beta) \right)}{\left( 1 + \sum_{l=1}^K \frac{n_l}{n_0 \pi_l} P_l(Z_i; \beta) \right)^2}, \\
 -\frac{\partial \hat{l}_3(\beta, \pi)}{\partial \pi_m \partial \pi_r} &= - \sum_{k=0}^K \sum_{i \in S_k} \frac{\frac{n_m}{n_0 \pi_m^2} P_m(Z_i; \beta) \frac{n_r}{n_0 \pi_r^2} P_r(Z_i; \beta)}{\left( 1 + \sum_{l=1}^K \frac{n_l}{n_0 \pi_l} P_l(Z_i; \beta) \right)^2} + \sum_{k=0}^K \sum_{i \in S_k} \frac{\frac{2n_m}{n_0 \pi_m^2} P_m(Z_i; \beta) \delta_{mr}}{1 + \sum_{l=1}^K \frac{n_l}{n_0 \pi_l} P_l(Z_i; \beta)} - \frac{n_m}{\pi_m^2} \delta_{mr}, \tag{A.3}
 \end{aligned}$$

where  $\delta_{mr} = 1$  if  $m = r$  and 0 otherwise, for  $m, r = 1, \dots, K$ .

By a straightforward extension of the classical results on Cox's model (Andersen and Gill, 1982; Kalbfleisch and Prentice, 2002), we can obtain that  $\frac{1}{n} \frac{\partial \hat{l}_1(\beta)}{\partial \beta} \xrightarrow{P} 0$ ,  $-\frac{1}{n} \frac{\partial^2 \hat{l}_1(\beta)}{\partial \beta \partial \beta'} \xrightarrow{P} \rho_0 A_0(\beta)$  uniformly for  $\beta$  in a neighborhood of  $\beta^0$ , and  $\frac{1}{\sqrt{n}} \frac{\partial \hat{l}_1(\beta^0)}{\partial \beta} \xrightarrow{d} N(0, \rho_0 A_0(\beta^0))$ , where  $\rho_0 = \lim_{n \rightarrow \infty} n_0/n$ , and  $A_0(\beta)$  is described in Section 2.3. Thus, according to the law of large numbers,

we can show that

$$\begin{aligned} \frac{1}{n} \frac{\partial \hat{l}(\xi)}{\partial \beta} &\xrightarrow{P} \sum_{k=1}^K \rho_k E_k \left( \frac{\nabla_{\beta} f_{\beta, \hat{\Lambda}_0}(T|Z)}{f_{\beta, \hat{\Lambda}_0}(T|Z)} \right) - \sum_{k=0}^K \rho_k E_k \left( \frac{\sum_{l=1}^K \frac{\rho_l}{\rho_0 \pi_l} \nabla_{\beta} P_l(Z; \beta)}{1 + \sum_{l=1}^K \frac{\rho_l}{\rho_0 \pi_l} P_l(Z; \beta)} \right) \equiv s_1(\xi), \\ \frac{1}{n} \frac{\partial \hat{l}(\xi)}{\partial \pi} &\xrightarrow{P} \sum_{k=0}^K \rho_k E_k \left( \begin{array}{c} \frac{\frac{\rho_1}{\rho_0 \pi_1^2} P_1(Z; \beta)}{1 + \sum_{l=1}^K \frac{\rho_l}{\rho_0 \pi_l} P_l(Z; \beta)} \\ \vdots \\ \frac{\frac{\rho_K}{\rho_0 \pi_K^2} P_K(Z; \beta)}{1 + \sum_{l=1}^K \frac{\rho_l}{\rho_0 \pi_l} P_l(Z; \beta)} \end{array} \right) - \begin{pmatrix} \frac{\rho_1}{\pi_1} \\ \vdots \\ \frac{\rho_K}{\pi_K} \end{pmatrix} \equiv s_2(\xi), \end{aligned} \quad (\text{A.4})$$

where  $\rho_0 = \lim_{n \rightarrow \infty} n_0/n$ ,  $\rho_k = \lim_{n \rightarrow \infty} n_k/n$ . Then we have  $\frac{1}{n} \frac{\partial \hat{l}(\xi)}{\partial \xi}$  converges to  $s(\xi) \equiv \begin{pmatrix} s_1(\xi) \\ s_2(\xi) \end{pmatrix}$  in probability. When evaluate at the true value  $\xi^0$ , we can show  $s(\xi^0) \xrightarrow{P} 0$ .

Furthermore, by the uniform convergence theorem established by Jennich (1969), we can obtain that  $-\frac{1}{n} \frac{\partial^2 \hat{l}(\xi)}{\partial \xi \partial \xi'}$  converges to  $J(\xi)$  in probability uniformly for  $\xi$  in a neighborhood around  $\xi^0$ , where  $J(\xi) = \begin{pmatrix} J_{11}(\xi) & J_{12}(\xi) \\ J_{12}(\xi)' & J_{22}(\xi) \end{pmatrix}$  with

$$\begin{aligned} J_{11}(\xi) &= \rho_0 A_0(\beta) + \sum_{k=1}^K \rho_k E_k \left( -\nabla_{\beta}^2 \log f_{\beta, \hat{\Lambda}_0}(T|Z) \right) + \sum_{k=0}^K \rho_k E_k \left( \nabla_{\beta}^2 \log \left( 1 + \sum_{l=1}^K \frac{\rho_l}{\rho_0 \pi_l} P_l(Z; \beta) \right) \right), \\ J_{22}(\xi) &= \sum_{k=0}^K \rho_k E_k \left( \nabla_{\pi}^2 \log \left( 1 + \sum_{l=1}^K \frac{\rho_l}{\rho_0 \pi_l} P_l(Z; \beta) \right) \right) + \begin{pmatrix} \rho_1/\pi_1^2 & & \\ & \ddots & \\ & & \rho_K/\pi_K^2 \end{pmatrix}, \\ J_{12}(\xi) &= \sum_{k=0}^K \rho_k E_k \left( \nabla_{\beta \pi}^2 \log \left( 1 + \sum_{l=1}^K \frac{\rho_l}{\rho_0 \pi_l} P_l(Z; \beta) \right) \right). \end{aligned}$$

By Assumption (C7), it also can be shown that  $J(\xi^0)$  is invertible. Then, the convergence of  $\hat{\xi}$  is achieved by applying Lemma 3.3 in Weaver (2001).

Given the consistency result we obtain, we can derive the asymptotic normal properties of EMSELE by standard methods. By using the first-order Taylor series expansion of  $\frac{\partial l_P(\xi)}{\partial \xi}$  at  $\xi^0$ , we have

$$\sqrt{n}(\hat{\xi} - \xi^0) = \left( -\frac{1}{n} \frac{\partial^2 \hat{l}(\xi^*)}{\partial \xi \partial \xi'} \right)^{-1} \left( \begin{pmatrix} \frac{1}{\sqrt{n}} \frac{\partial \hat{l}_1(\beta^0)}{\partial \beta} \\ 0 \end{pmatrix} + \begin{pmatrix} \frac{1}{\sqrt{n}} \frac{\partial \hat{l}_2(\beta^0)}{\partial \beta} \\ 0 \end{pmatrix} + \frac{1}{\sqrt{n}} \frac{\partial \hat{l}_3(\xi^0)}{\partial \xi} \right), \quad (\text{A.5})$$

where  $\xi^*$  lies on the line between  $\hat{\xi}$  and  $\xi^0$ . Using the consistency of  $\hat{\xi}$ , it is obvious to conclude

that  $\left(-\frac{1}{n} \frac{\partial^2 l_P(\xi^*)}{\partial \xi \partial \xi'}\right)^{-1} \xrightarrow{P} J^{-1}(\xi^0)$  as  $n \rightarrow \infty$ . It follows the Central Limit Theorem that

$$\begin{pmatrix} \frac{1}{\sqrt{n}} \frac{\partial \hat{l}_1(\beta^0)}{\partial \beta} \\ 0 \end{pmatrix} \xrightarrow{d} N\left(0, \begin{pmatrix} \rho_0 A_0(\beta) & 0 \\ 0 & 0 \end{pmatrix}\right),$$

$$\begin{pmatrix} \frac{1}{\sqrt{n}} \frac{\partial \hat{l}_2(\beta^0)}{\partial \beta} \\ 0 \end{pmatrix} \xrightarrow{d} N\left(0, \begin{pmatrix} \sum_{k=1}^K \rho_k \text{Var}_k(e(\beta)) & 0 \\ 0 & 0 \end{pmatrix}\right), \quad (\text{A.6})$$

and

$$\frac{1}{\sqrt{n}} \frac{\partial \hat{l}_3(\xi^0)}{\partial \xi} \xrightarrow{d} N(0, \Sigma_3(\xi^0)), \quad (\text{A.7})$$

with

$$\Sigma_3(\xi) = \sum_{k=0}^K \rho_k \text{Var}_k \begin{pmatrix} -\frac{\sum_{l=1}^K \frac{\rho_l/\rho_0}{\pi_l} \nabla_{\beta} P_l(Z;\beta)}{1 + \sum_{l=1}^K \frac{\rho_l/\rho_0}{\pi_l} P_l(Z;\beta)} \\ \frac{\frac{\rho_1/\rho_0}{\pi_1^2} P_1(Z;\beta)}{1 + \sum_{l=1}^K \frac{\rho_l/\rho_0}{\pi_l} P_l(Z;\beta)} - \frac{\rho_1}{\pi_1} \\ \vdots \\ \frac{\frac{\rho_K/\rho_0}{\pi_K} P_K(Z;\beta)}{1 + \sum_{l=1}^K \frac{\rho_l/\rho_0}{\pi_l} P_l(Z;\beta)} - \frac{\rho_K}{\pi_K} \end{pmatrix}.$$

The asymptotic property of  $\hat{\xi}$  holds by Slutsky's theorem. Finally, by consistency results and the continuous mapping theorem, a consistent estimator for the asymptotic covariance matrix  $\Sigma(\xi^0)$  is  $\hat{J}^{-1}(\hat{\xi})(\hat{\Sigma}_1(\hat{\xi}) + \hat{\Sigma}_2(\hat{\xi}) + \hat{\Sigma}_3(\hat{\xi}))\hat{J}^{-1}(\hat{\xi})$ , where  $\hat{J}$ ,  $\hat{\Sigma}_1$ ,  $\hat{\Sigma}_2$  and  $\hat{\Sigma}_3$  are obtained by replacing the large-sample quantities in  $J$ ,  $\Sigma_1$ ,  $\Sigma_2$  and  $\Sigma_3$  with their corresponding small-sample quantities.

#### REFERENCES

- ANDERSEN, P., AND GILL, R. (1982). Cox's Regression Model for Counting Processes: A Large Sample Study. *The Annals of Statistics* **10**, 1100–1120.
- FOUTZ, R. V. (1977). On the Unique Consistent Solution to the Likelihood Equations. *Journal of the American Statistical Association* **72**, 147–148.

JENNRICH, R. T. (1969). Asymptotic Properties of Non-Linear Least Squares Estimators. *The Annals of Mathematical Statistics* **40**, 633–643.

KALBFLEISCH, J. D., AND PRENCTICE, R. L. *The Statistical Analysis of Failure Time Data*. John Wiley & Sons, Inc, 2002.

WEAVER, M. A. Semiparametric Methods for Continuous Outcome Regression Models with Covariate Data from an Outcome Dependent Subsample. Ph.D. Thesis, University Of North Carolina At Chapel Hill, 2001.
